# Supplementary material
Source: Research Square preprint supplement (doi:10.21203/rs.3.rs-10017242/v1)
Supplement: Supplementary file 1 [file b2f9c0dc034430296fbb732c.docx]

**Highlights:**

- Hydrothermal carbonization of mixed rice husk and food waste improved hydrochar fuel quality.

- Reaction temperature governed hydrochar yield and energy recovery, while feedstock ratio mainly affected HHV.

- Response surface optimization identified moderate temperature and intermediate blending as optimal HTC conditions.
